# Supplementary material for: WNK1 collaborates with TGF-β in endothelial cell junction turnover and angiogenesis
Source: PubMed Central journal article supplement — Proc Natl Acad Sci U S A. 2022 Jul 22;119(30):e2203743119. doi: 10.1073/pnas.2203743119 (PMC9335306; doi:10.1073/pnas.2203743119), 2022-07-22
Supplement: pnas.2203743119.sapp.pdf [file pnas.2203743119.sapp.pdf]

# Supplementary Figure 1

**A**

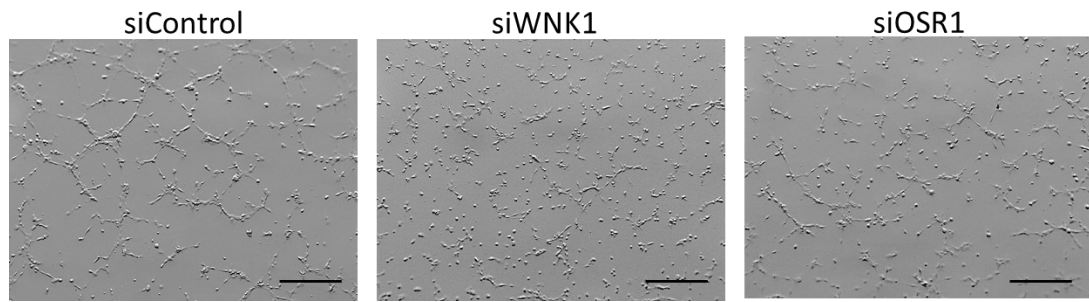

**B**

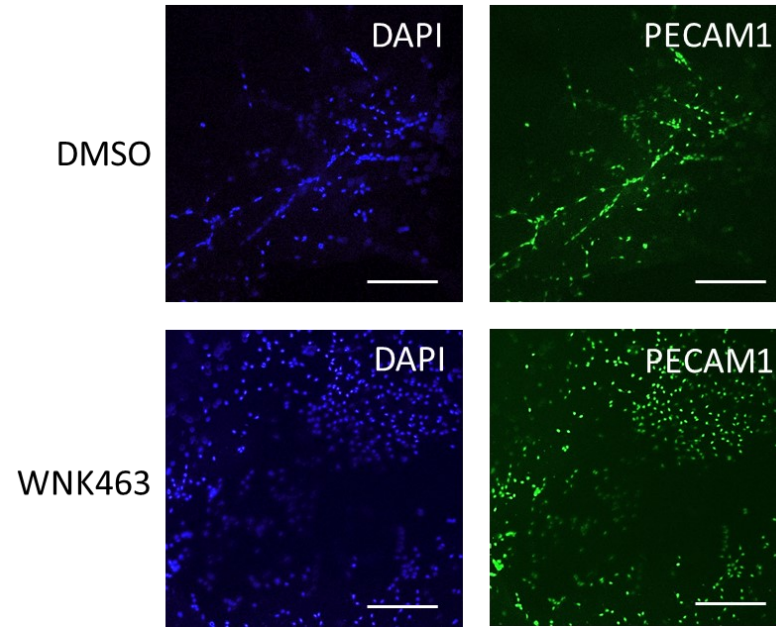

Supplementary Figure 2

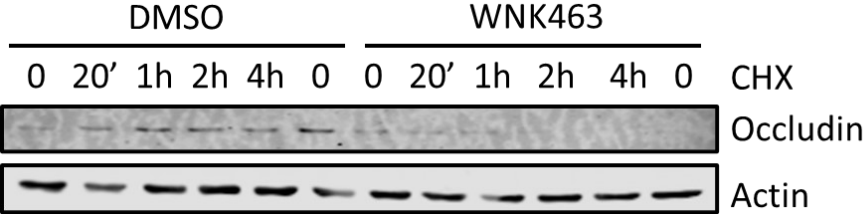

Supplementary Figure 3

|   |   |   |   |   |   |             |
|---|---|---|---|---|---|-------------|
| + | + | - | - | - | - | IP Control  |
| - | - | + | + | - | - | IP Occludin |
| - | + | - | + | - | + | MO25        |
| + | + | + | + | + | + | OSR1        |

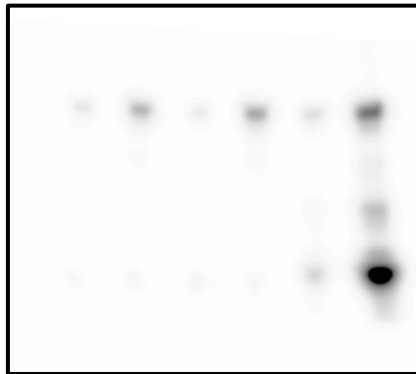

Occludin

OSR1

MBP

# Supplementary Figure 4

## A

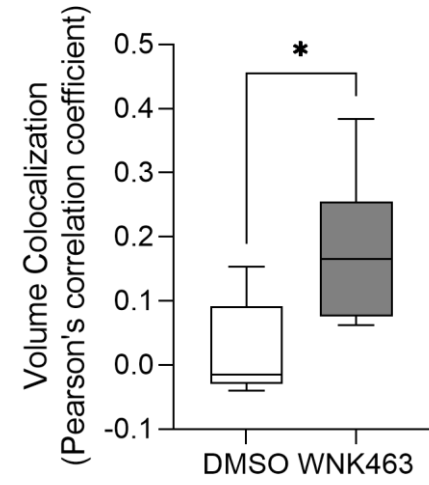

Supplementary Figure 5

**A**

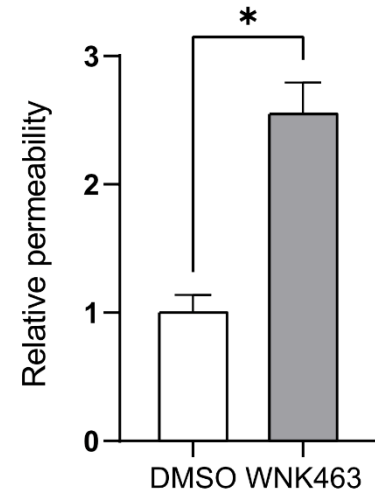

Supplementary Figure 6

A

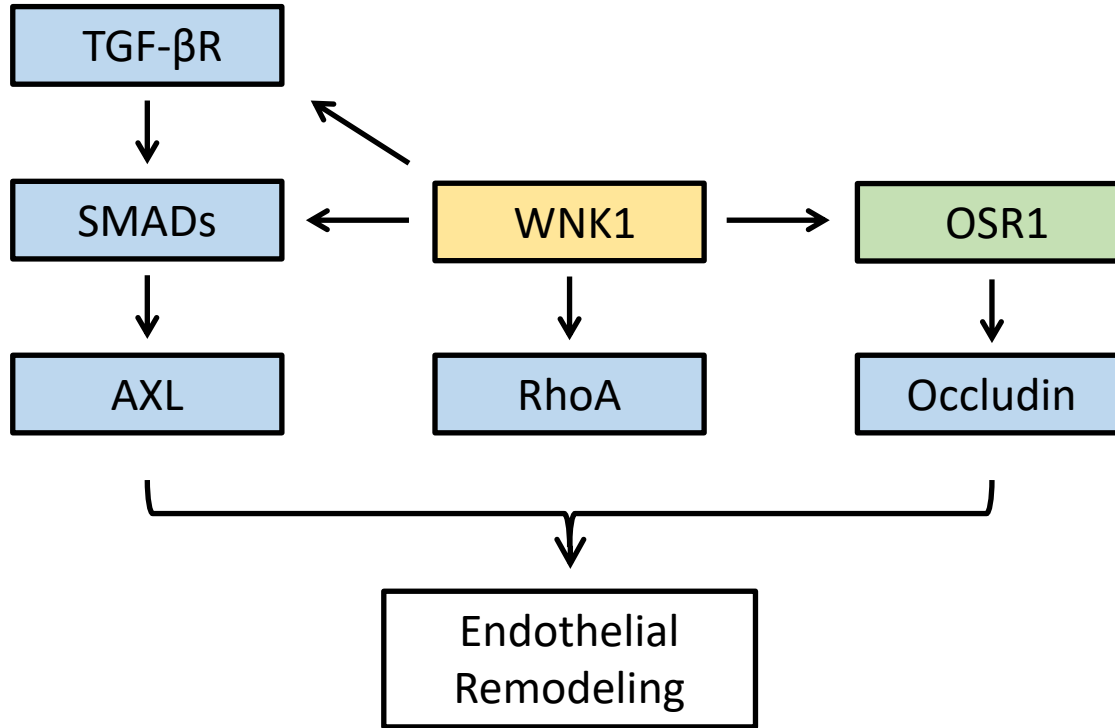

## **Legends for Movies S1 and S2**

**Supplemental Movie S1 and S2. Real-time imaging of cord formation in primary HUVECs.** Real-time imaging of cord formation showed that primary HUVEC cells treated with WNK463 (Movie S2) compared to DMSO (Movie S1) exhibited defects in cell migration; n=3

## Legends for Datasets S1 to S6

### **Figure S1. Sprouting angiogenesis is decreased with WNK463 treatment. A)**

Representative bright-field images of cord formation in HUVECs treated with siWNK1 or siOSR1 show reduced cord formation compared to siControl; Scale=1 mm. **B)** The endothelial marker PECAM staining of ex-vivo mouse aortic ring slice culture after 6 days of WNK463 treatment show decreased sprouting angiogenesis and cord formation compared to DMSO control; Scale = 1 mm, n=3.

### **Figure S2. Regulation of tight junction occludin by WNK1/OSR1**

Western blot show occludin protein expression upon 4 hour-time course treatment of cycloheximide (CHX: 100 µg/ml) in HUVECs pre-treated with DMSO control or WNK463 (1µM) for 24 hours.

### **Figure S3. OSR1 does not phosphorylate occludin *in vitro*.**

Autoradiograph show *in vitro* kinase assay performed with flag-occludin immunoprecipitated from HEK cells, 9 µg GST-OSR1 and 0.83 mg/ml MBP as substrate in the presence or absence of 4µM GST-MO25 (master regulator of OSR1).

### **Figure S4. Co-localization of OSR1 and occludin increases upon WNK1 inhibition.**

**A)** Immunofluorescence staining of OSR1 and occludin in HUVECs treated with DMSO control or WNK463 (1 µM) and pre-treated with 0.5M NaCl for 5 min show colocalization between OSR1 and occludin measured as Pearson's correlation coefficient; n=6.

### **Figure S5: Inhibition of WNK1 decreases junctional maturity. A)**

Relative endothelial permeability measured by Transwell permeability assay in HUVECs treated with DMSO or WNK463 (1 µM); n=4. \* p<0.05 by Student's 2-tailed *t*- test.

**Figure S6: A)** Schematic representation of cooperation between WNK1 and TGF-β signaling components
